# Supplementary material
Source: PubMed Central journal article supplement (PMC4077216)

## Magnetically Actuable Polymeric Nanoparticles for On-Demand Drug Release

Seong Deok Kong<sup>1</sup>, Marta Sartor<sup>1</sup>, Che-Ming Jack Hu<sup>2</sup>, Weizhou Zhang<sup>3</sup>, Liangfang Zhang<sup>2\*</sup>, and Sungho Jin<sup>1,4\*</sup>

<sup>1</sup>Materials Science & Engineering, UC San Diego, La Jolla, CA 92093.

<sup>2</sup>Department of Nanoengineering, UC San Diego, La Jolla, CA 92093.

<sup>3</sup>Department of Pharmacology, School of Medicine, UC San Diego, La Jolla, CA 92093.

<sup>4</sup>Department of Mechanical & Aerospace Engineering, UC San Diego, La Jolla, CA 92093.

Figure S1. TEM micrograph of spherical PLGA nanoparticles (a) urenyl acetate stained lipid-PLGA hybrid nanoparticles which contain magnetic nanoparticles (b) trapped magnetic nanoparticles in lipid-PLGA hybrid nanoparticles (without urenyl acetate staining).

(a)

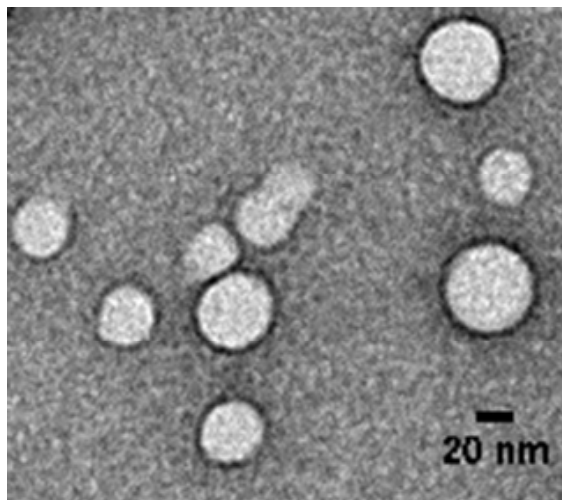

(b)

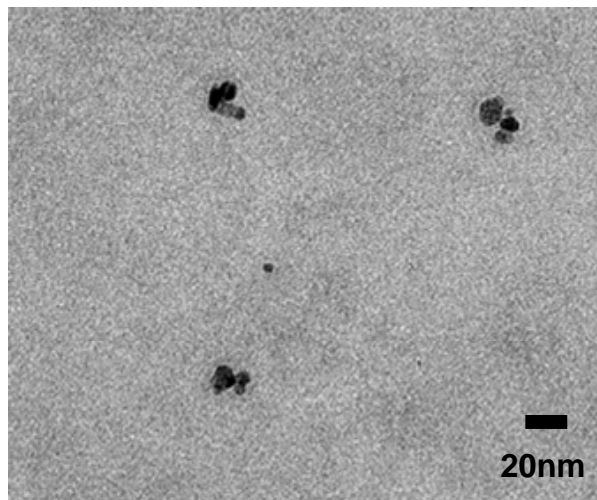

Supplement: NIHMS593517-supplement-SuppData.pdf [file NIHMS593517-supplement-SuppData.pdf]
